# Supplementary material for: The radish genome and comprehensive gene expression profile of tuberous root formation and development
Source: PubMed Central journal article supplement (PMC4650646; doi:10.1038/srep10835), 2015-06-09
Supplement: srep10835-s1.pdf [file srep10835-s1.pdf]

**The radish genome and comprehensive gene expression profile of tuberous root formation and development**

Yuki Mitsui<sup>1\*</sup>, Michihiko Shimomura<sup>2\*</sup>, Kenji Komatsu<sup>1\*</sup>, Nobukazu Namiki<sup>2</sup>, Mari Shibata-Hatta<sup>1</sup>,  
Misaki Imai<sup>1</sup>, Yuichi Katayose<sup>3</sup>, Yoshiyuki Mukai<sup>3</sup>, Hiroyuki Kanamori<sup>3</sup>, Kanako Kurita<sup>3</sup>, Tsutomu  
Kagami<sup>4</sup>, Akihito Wakatsuki<sup>4</sup>, Hajime Ohyanagi<sup>2</sup>, Hiroshi Ikawa<sup>2</sup>, Nobuhiro Minaka<sup>1,5</sup>, Kunihiro  
Nakagawa<sup>1</sup>, Yu Shiwa<sup>1</sup>, Takuji Sasaki<sup>1,3</sup>

<sup>1</sup> Tokyo University of Agriculture, 1-1-1, Sakuragaoka, Setagaya-ku, Tokyo 156-8502, Japan

<sup>2</sup> Mitsubishi Space Software Co.,Ltd., 1-6-1, Takezono, Tsukuba, Ibaraki, 305-0032, Japan

<sup>3</sup> National Institute of Agricultural Sciences, 1-2, Owashi, Tsukuba, Ibaraki, 305-8634, Japan

<sup>4</sup> Sakata Seed Corporation, 2-7-1, Nakamachidai, Tuzuki-ku, Yokohama, 224-0041, Japan

<sup>5</sup> National Institute of Agro-Environmental Sciences, 3-1-3, Tukuba, 305-8604, Japan

\* To whom correspondences should be addressed. Yuki Mitsui, Tel: +81 46 270 6289; Fax: +81  
270 6289; Email: y3mitsui@nodai.ac.jp, Michihoko Shimomura, Tel: +81 29 859 0311; Fax:  
+81 29 859 0321; Email: Shimomura.Michihiko@mss.co.jp, Kenji Komatsu, Tel: +81 3 5477  
2468; Fax: +81 3 5477 2628; Email: k4komats@nodai.ac.jp.

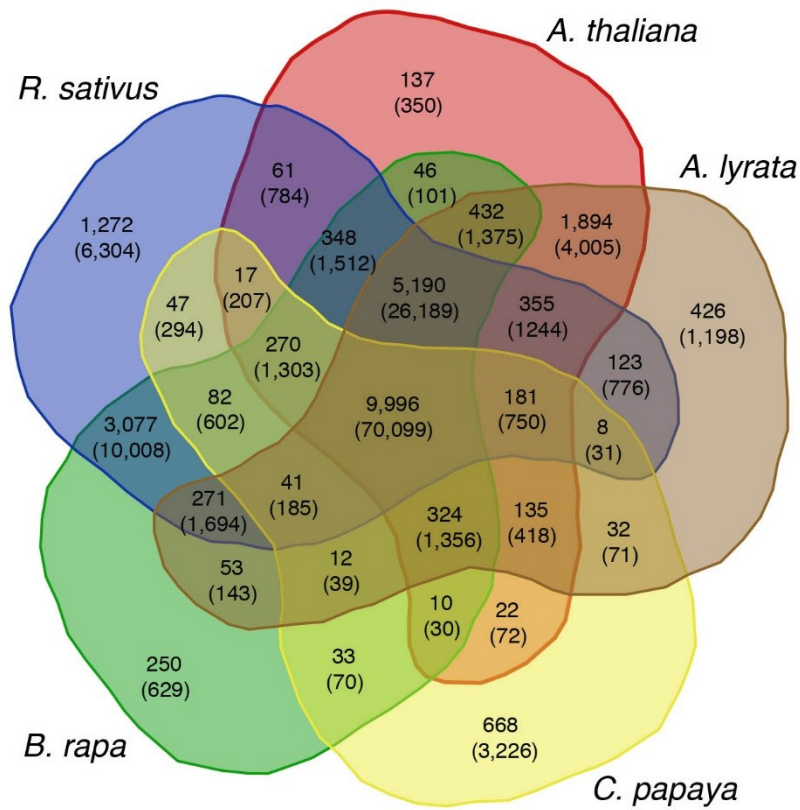

**Supplementary Figure S1. Venn diagram of specific and shared gene families of *R. sativus* with related Brassicales species, namely, *A. thaliana*, *A. lyrata*, *B. rapa* and *C. papaya*, using Calculate and draw custom Venn diagrams (<http://bioinformatics.psb.ugent.be/webtools/Venn/>). Numbers in parentheses indicated the number of genes in each cluster. The gene families were obtained from the following data repositories: The Arabidopsis Information Resource (<ftp://ftp.arabidopsis.org/home/tair/Genes/>); Phytozome: *Arabidopsis lyrata* (<ftp://ftp.jgi-psf.org/pub/compngen/phytozome/v9.0/Alyrata/>); Brassica Database (<http://brassicadb.org/brad/>); and Phytozome: *Carica papaya* (<ftp://ftp.jgi-psf.org/pub/compngen/phytozome/v9.0/Cpapaya/>).**

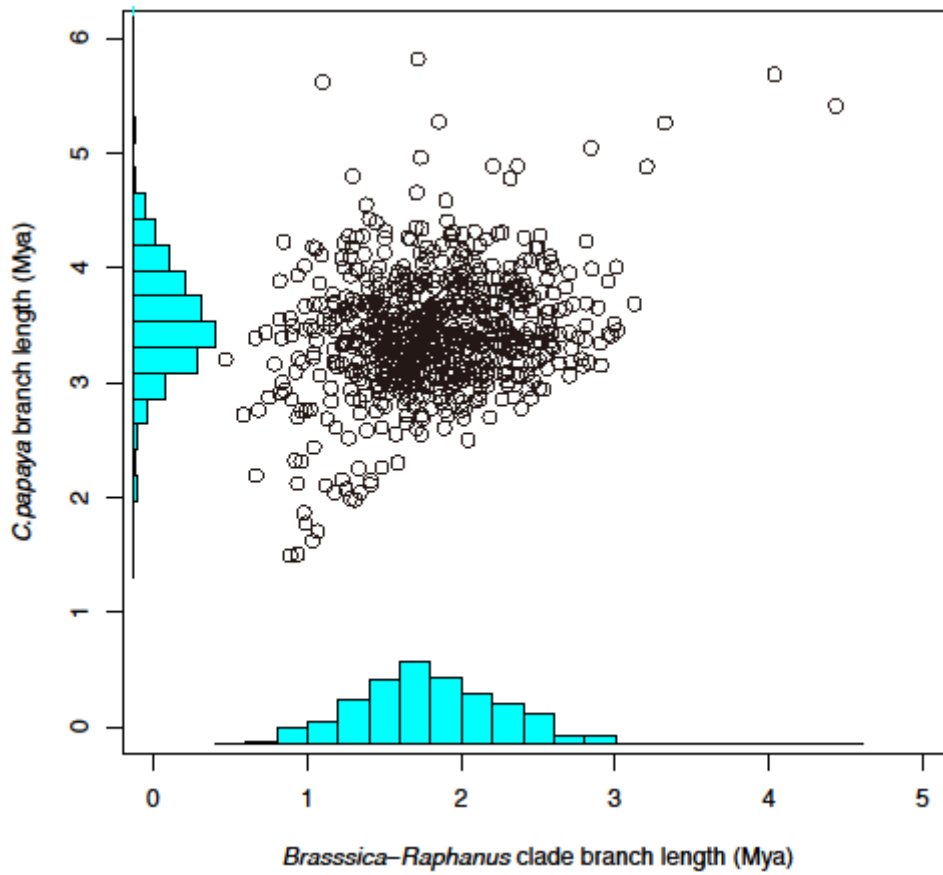

**Supplementary Figure S2. Branch era distribution of *Brassica-Raphanus* clade and *C. papaya*.** The horizontal axis corresponds to the branch era of *A. lyrata*, *A. thaliana*, *B. rapa*, *R. sativus* clade (*Brassica-Raphanus* clade) and the vertical axis corresponds to the branch era of *C. papaya*. Bar charts were normalized histogram of each axes.

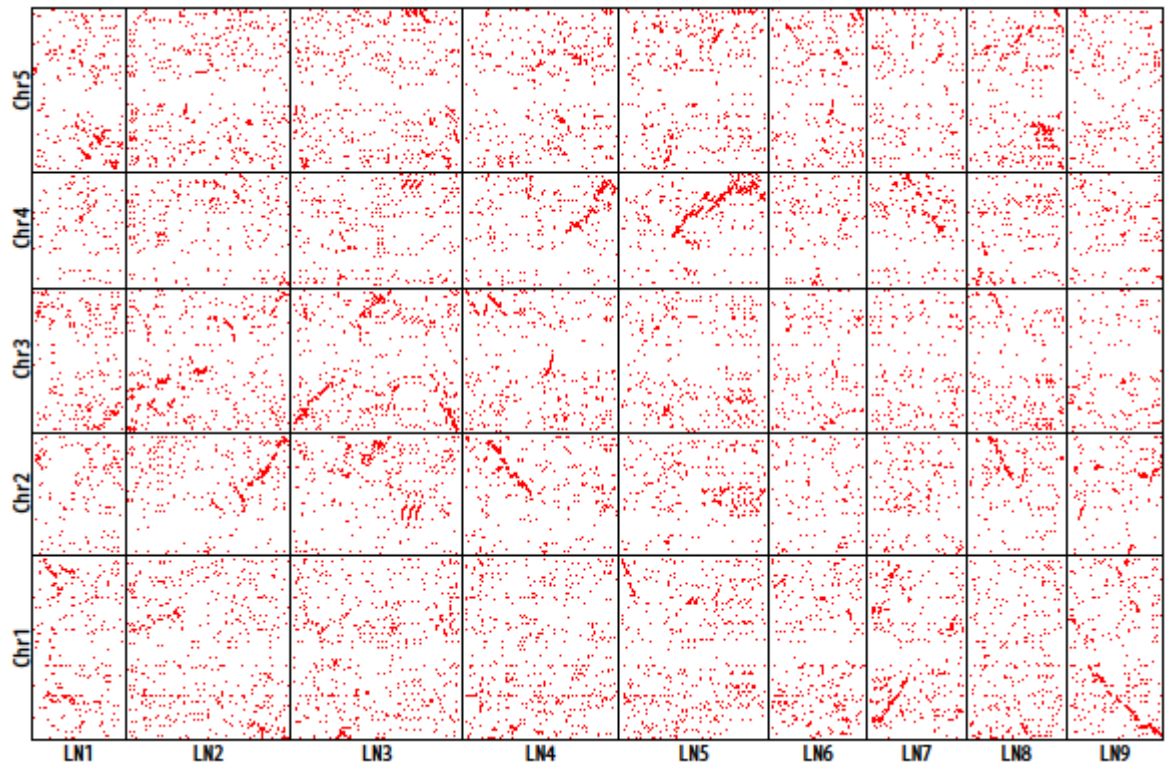

(a)

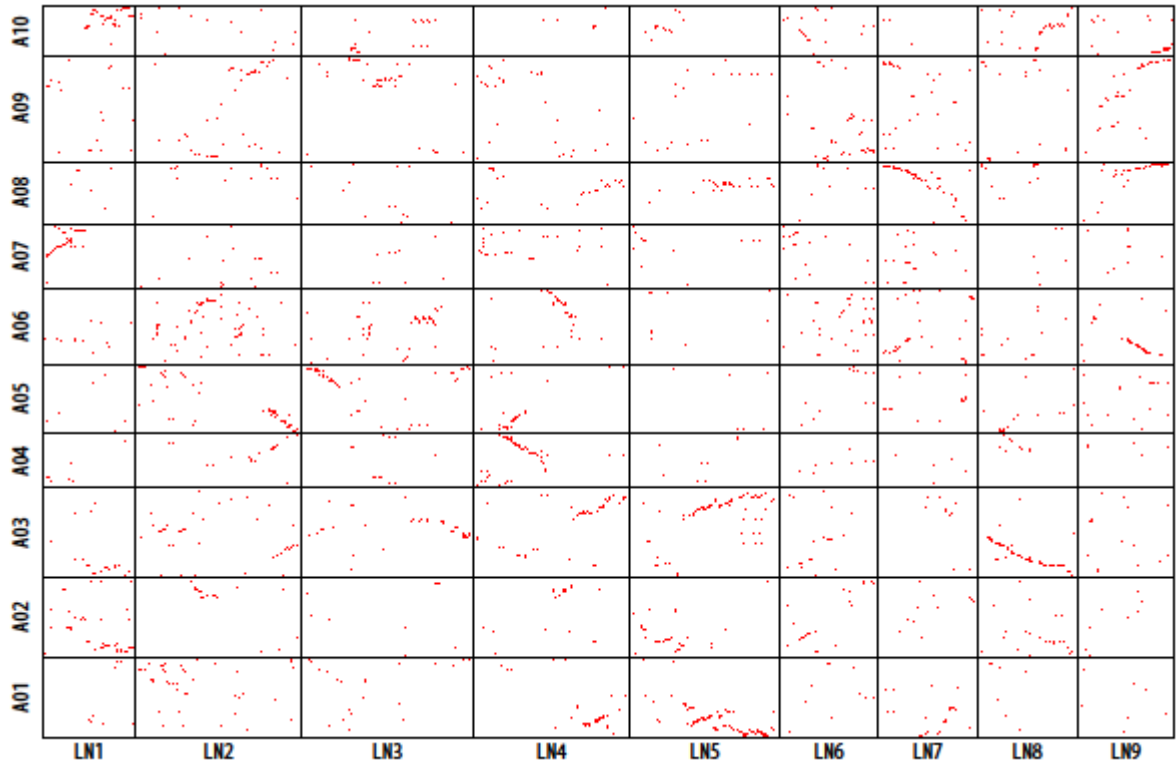

(b)

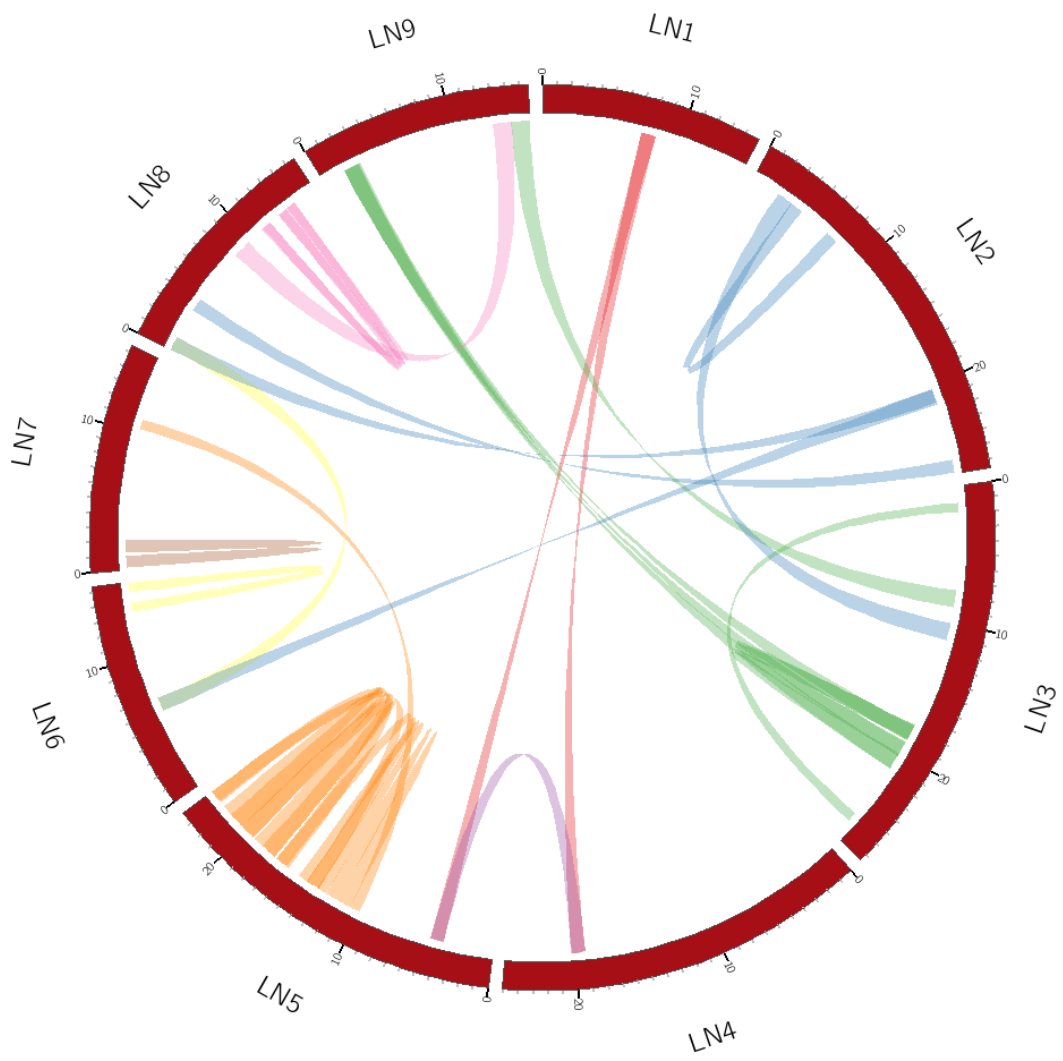

(c)

**Supplementary Figure S3. Syntenic blocks between *A. thaliana* vs. *R. sativus* (a), *B. rapa* vs. *R. sativus* (b) and *R. sativus* vs. *R. sativus* (c) based on BLASTp e-value of 1.0e-5.**

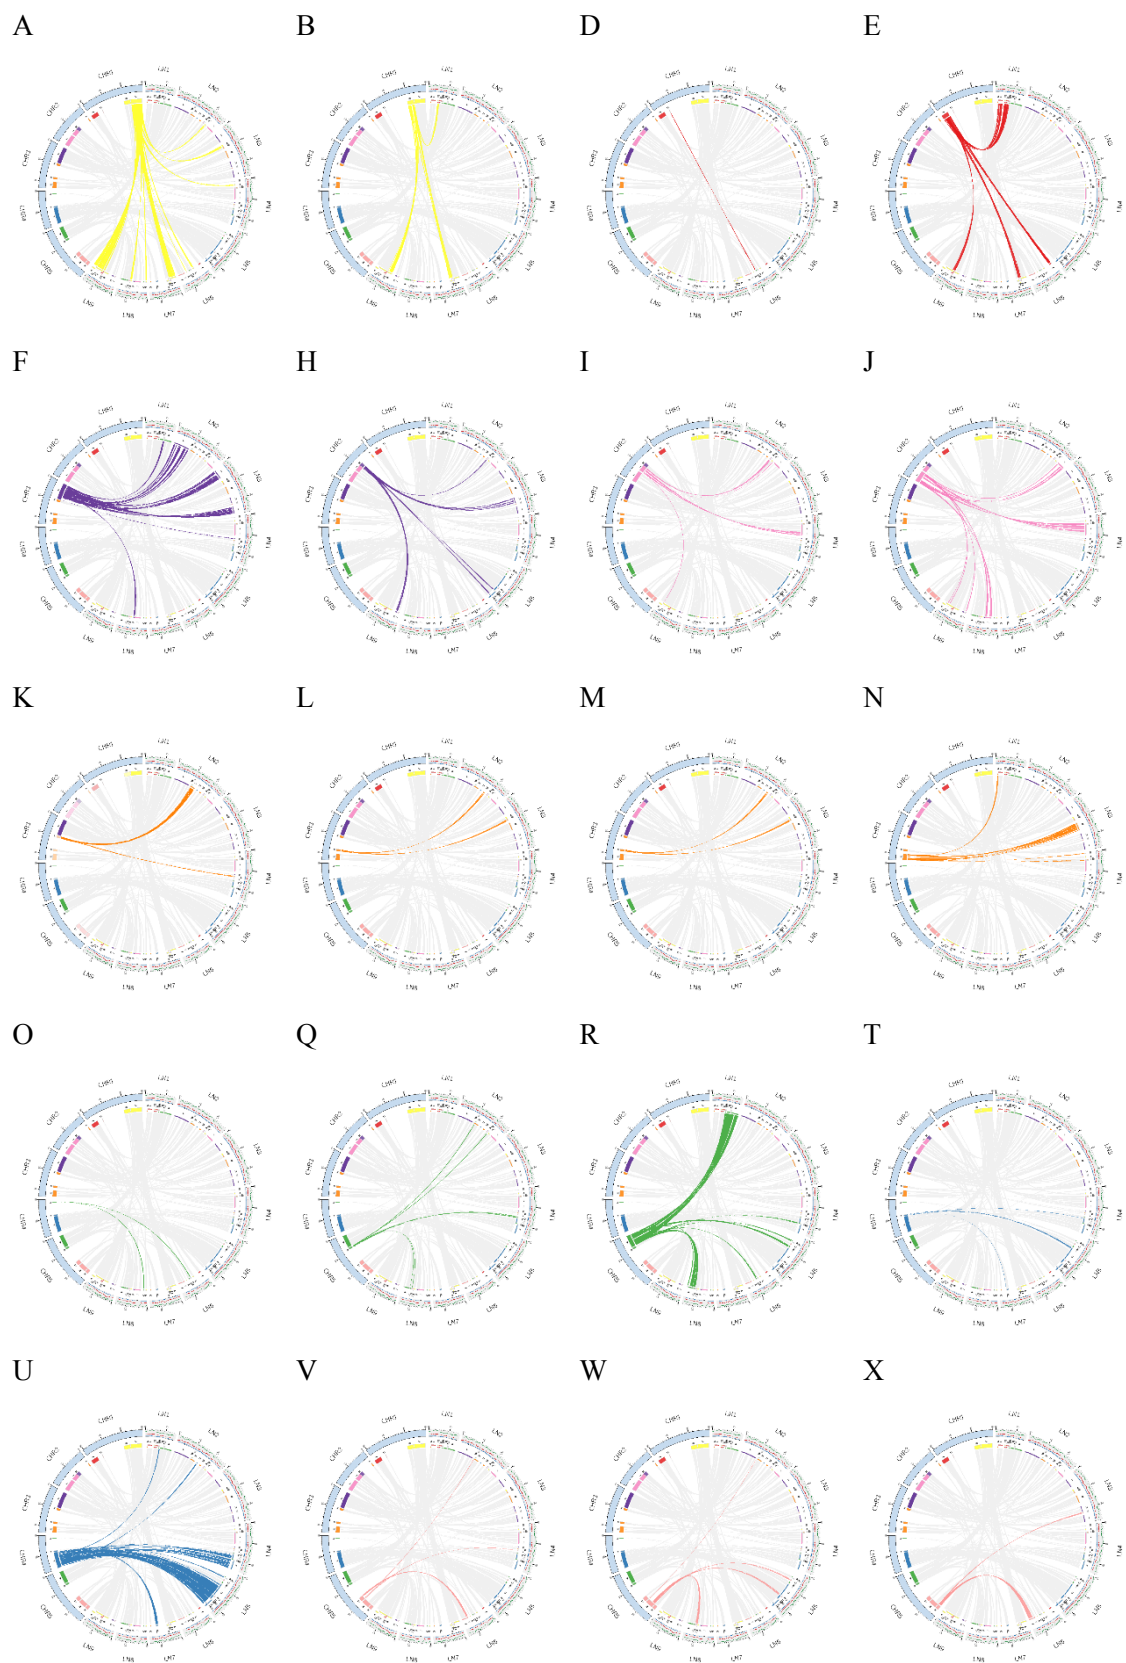

(a)

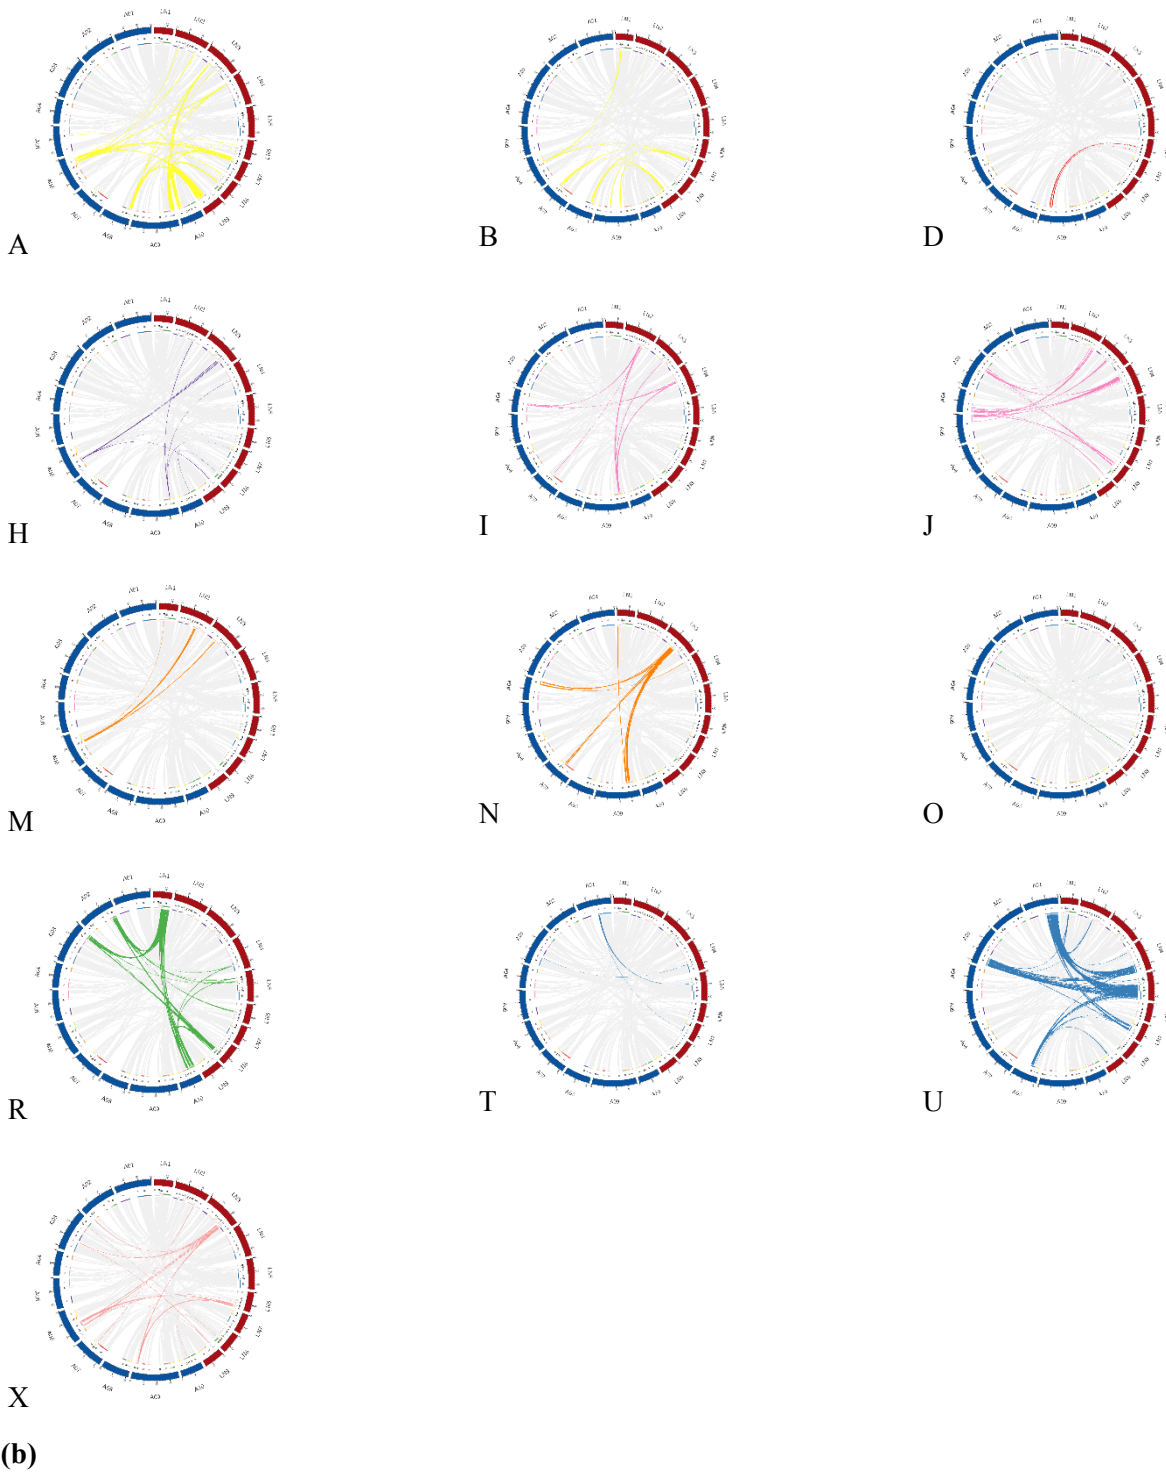

Supplementary Figure S4. Synteny between *A. thaliana* vs. *R. sativus* (a) and *B. rapa* vs. *R. sativus* (b) based on ABC blocks.



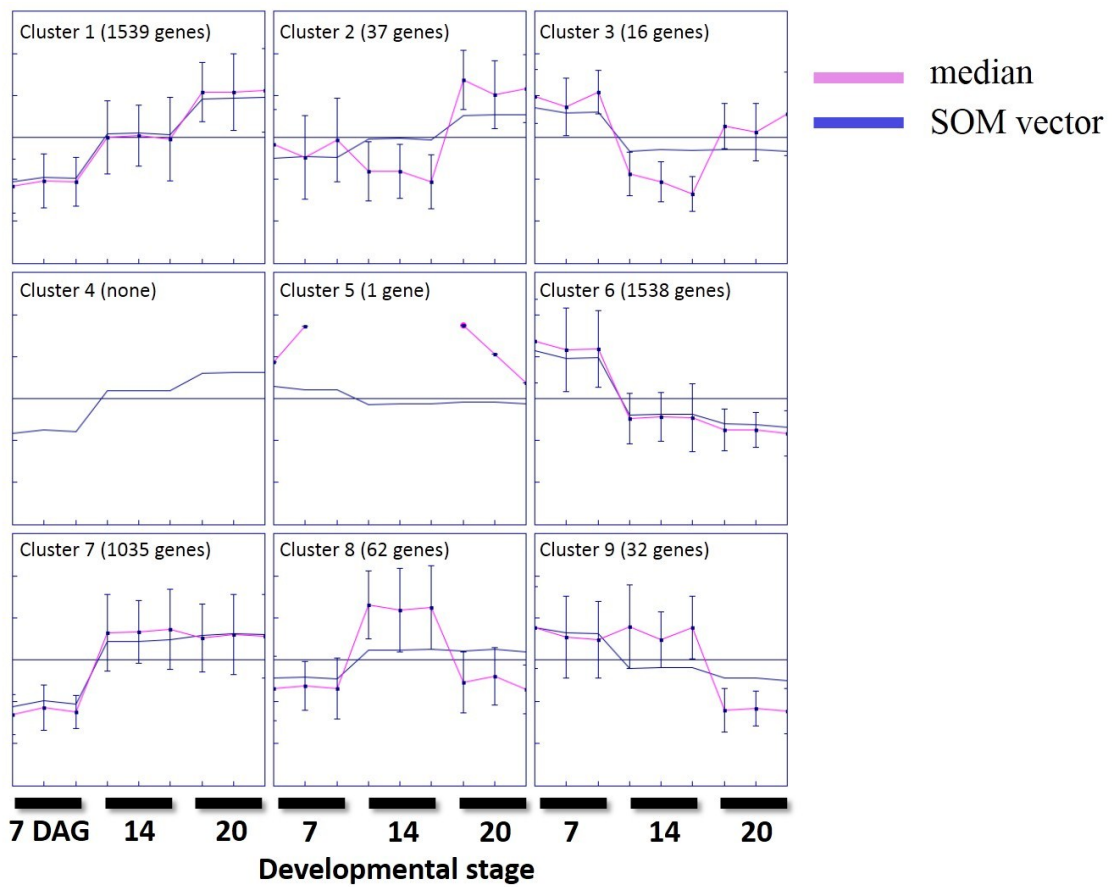

**Supplementary Figure S5. Clustering analysis by self-organizing maps (SOM) in the 4,260 differentially expressed genes (DEGs) detected among 7, 14, 20 DAG roots.**

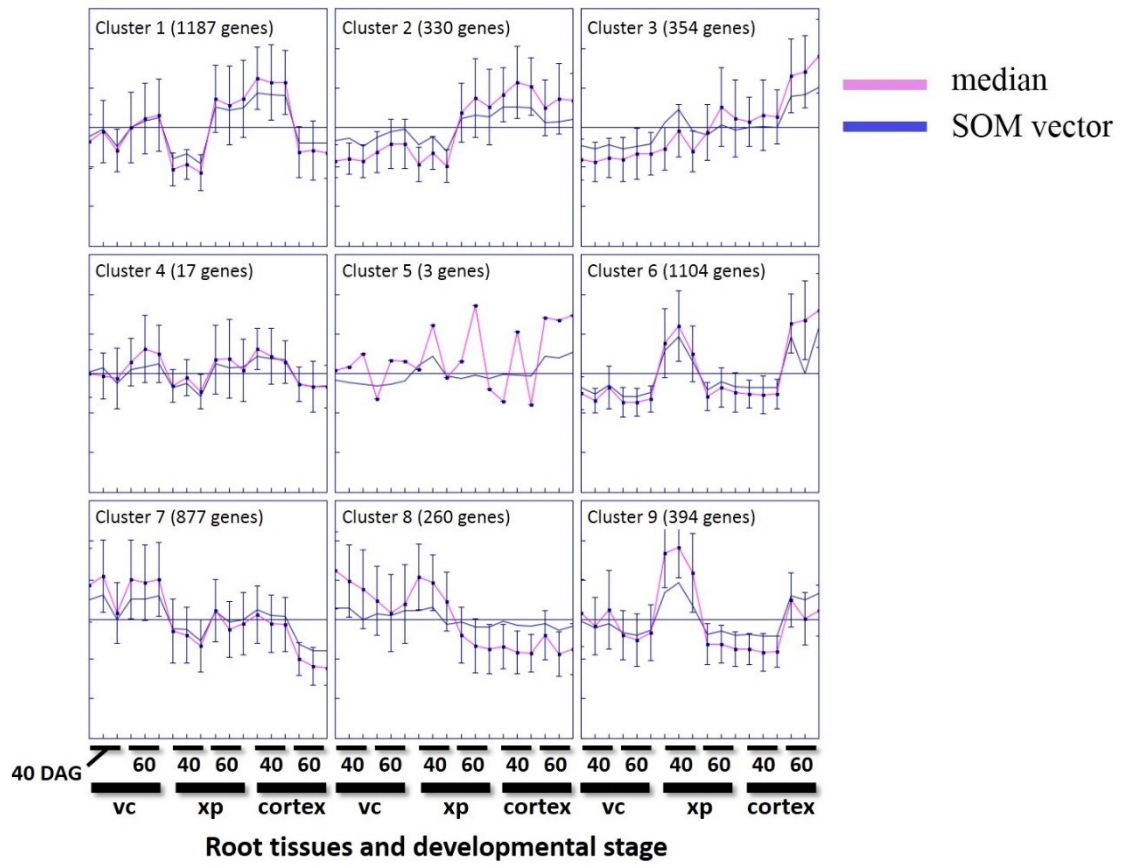

**Supplementary Figure S6. Clustering analysis by self-organizing maps (SOM) in the 4,526 differentially expressed genes (DEGs) detected among 40 and 60 DAG root vascular cambium (vc), root xylem parenchyma (xp) and root cortex.**

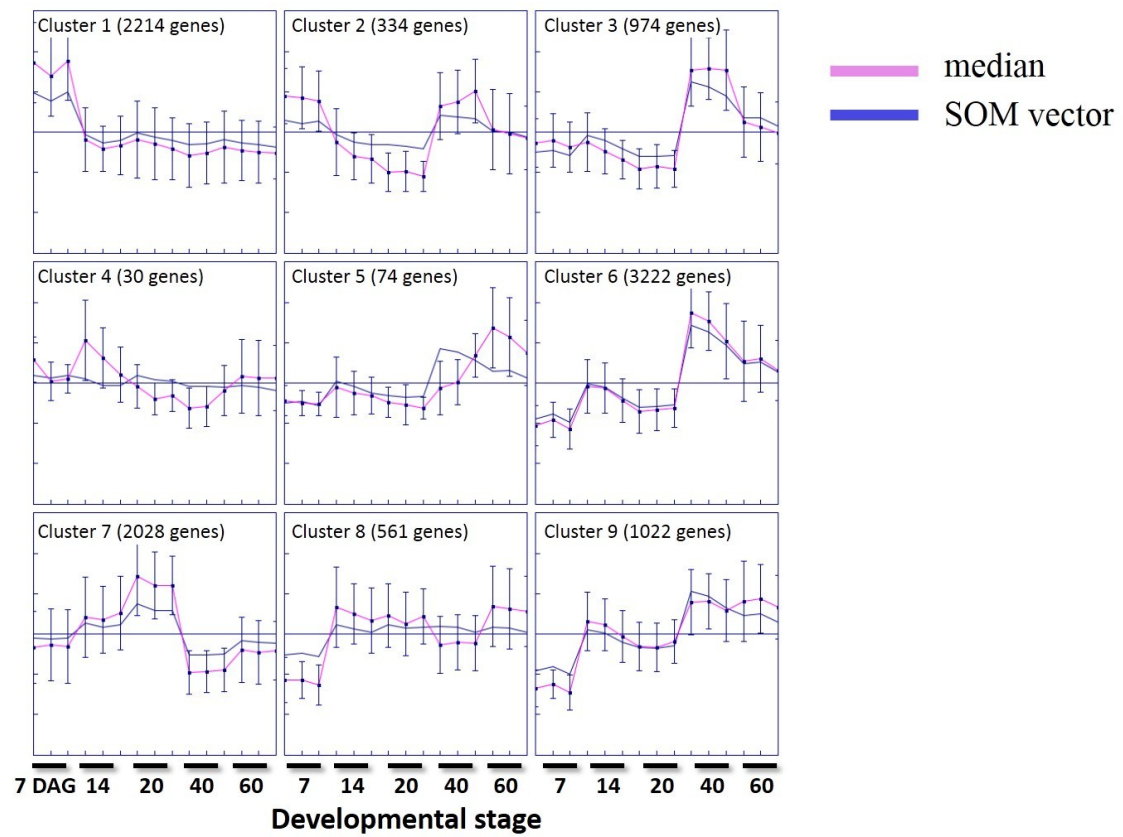

**Supplementary Figure S7. Clustering analysis by self-organizing maps (SOM) in the 10,468 differentially expressed genes (DEGs) detected among 7, 14, 20, 40, 60 DAG leaves.**

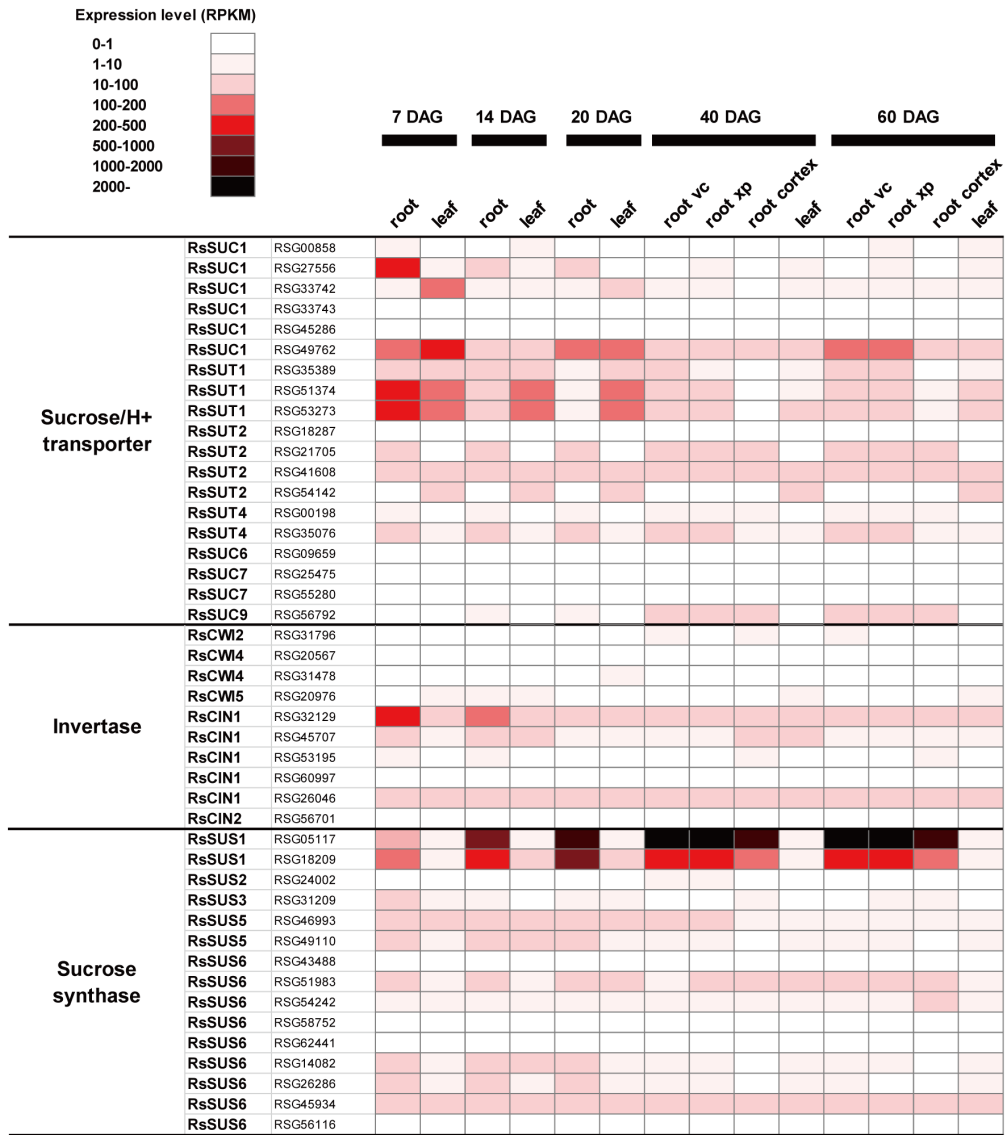

Supplementary Figure S8. Expression of genes encoding sucrose metabolism in multiple developmental stages and tissues.

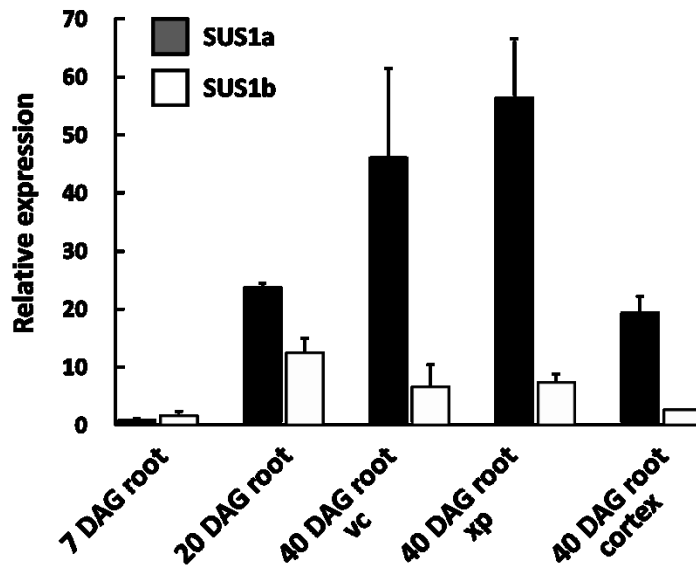

**Supplementary Figure S9.** The relative expression level of SUS1a (RSG05117) and SUS1b (RSG18209) based on RT-qPCR. The expression levels were adjusted by two reference genes (Actin and CAM7). The expression values of the two SUS1 genes are relative to those of 7 DAG roots. The values are mean  $\pm$  SD (n = 3).

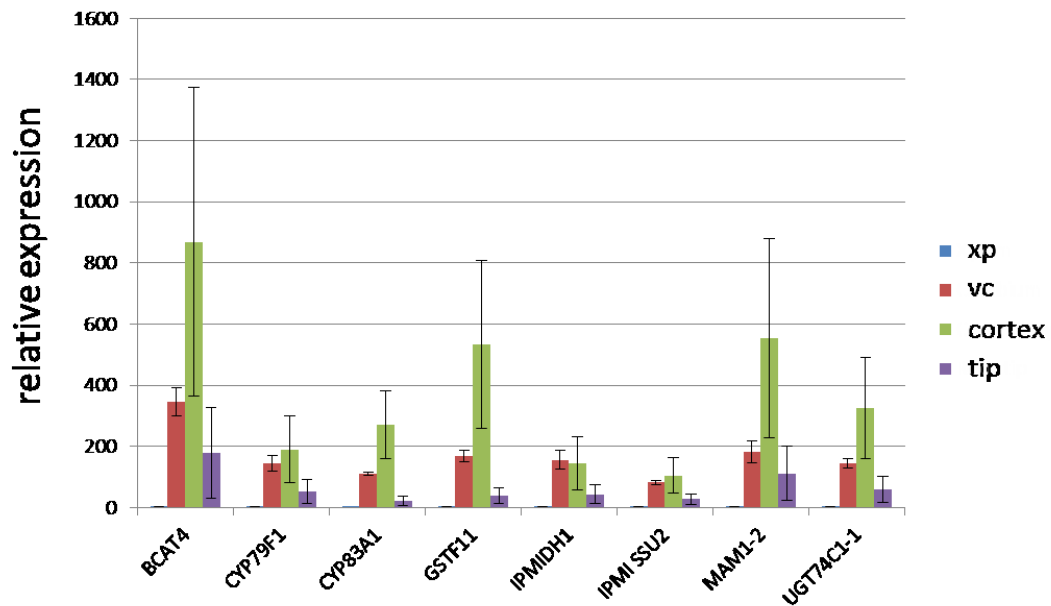

**Supplementary Figure S10. The relative expression level of glucosinolate biosynthesis genes in root.** The expression levels in root xylem parenchyma (xp), root vascular cambium (vc), root cortex and root tip were analyzed by RNA-seq analysis. The expression level of BCAT4, CYP79F1, CYP83A1, GSTF11, IPMIDH1, IPMI SSU2, MAM1-2 and UGT74C1-1 relative to those of the xylem parenchyma are shown. The values are mean  $\pm$  SE (n = 3).

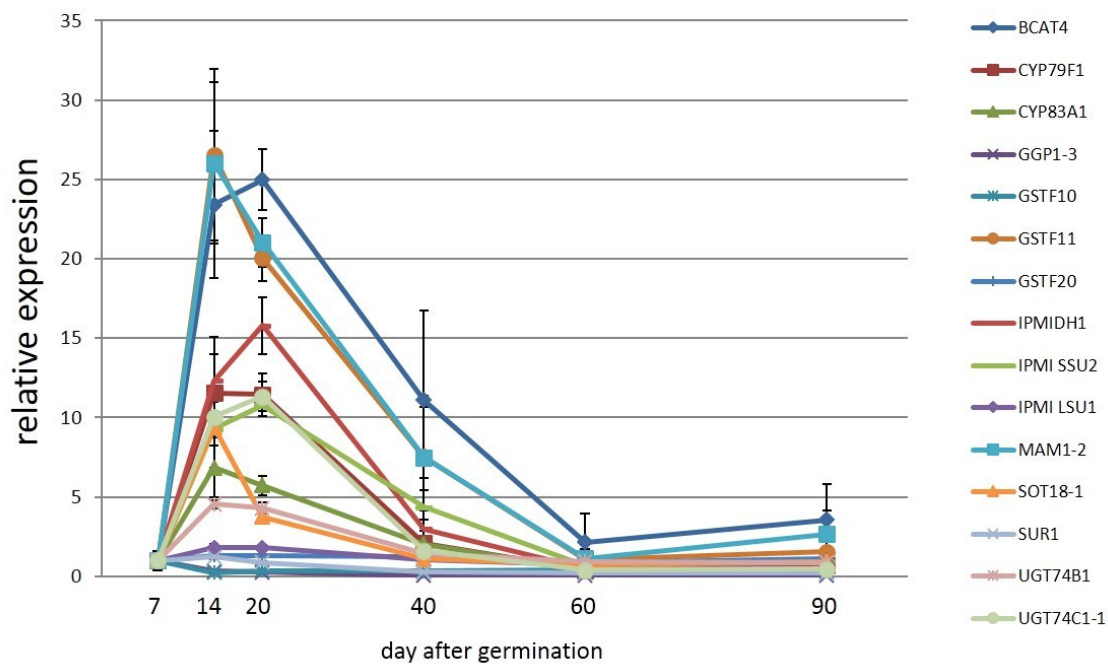

**Supplementary Figure S11. The relative expression level of glucosinolate biosynthesis genes in root development.** The expression levels in root (7, 14 and 20 days after germination: DAG) and root tip (40, 60 and 90 DAG) were analyzed by RNA-seq analysis. The expression level of BCAT4, CYP79F1, CYP83A1, GGP1-3, GSTF10, GSTF11, GSTF20, IPMIDH1, IPMI SSU2, IPMI LSU1, MAM1-2, SOT18-1, SUR1, UGT74B1 and UGT74C1-1 relative to those of the 7 DAG are shown. The values are mean  $\pm$  SE (n = 3).

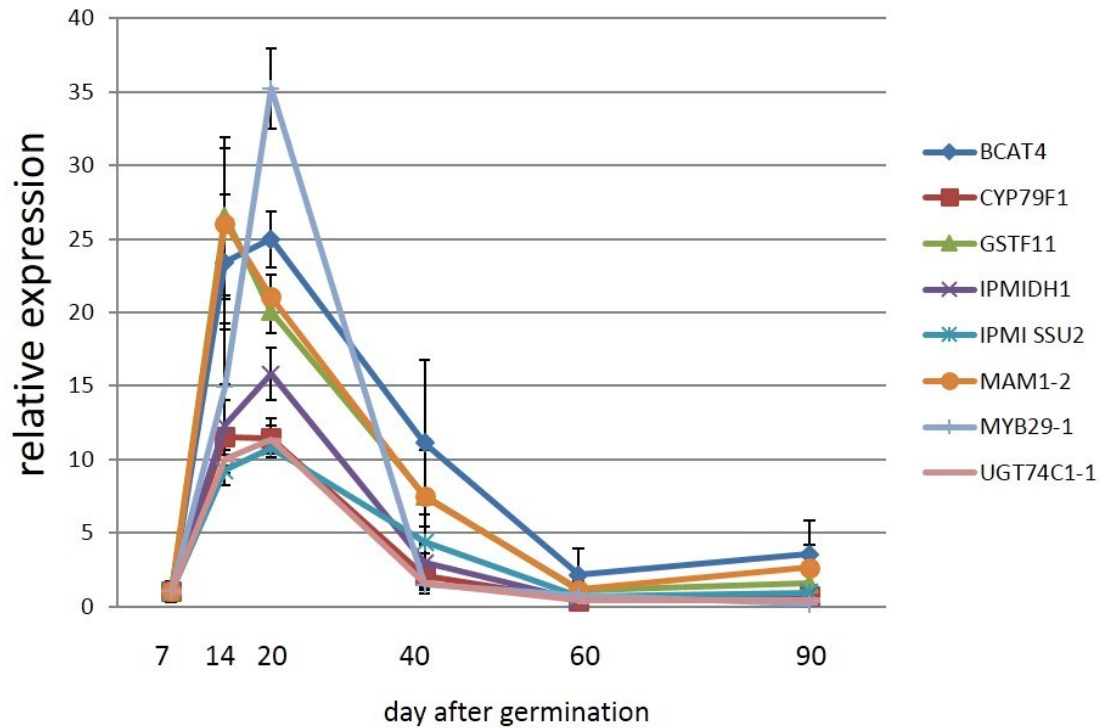

**Supplementary Figure S12. The relative expression level of MYB29 and glucosinolate biosynthesis genes in root development.** The expression levels in root (7, 14 and 20 days after germination: DAG) and root tip (40, 60 and 90 DAG) were analyzed by RNA-seq analysis. The expression level of BCAT4, CYP79F1, GSTF11, IPMIDH1, IPMI SSU2, MAM1-2, MYB29-1 and UGT74C1-1 relative to those of the 7 DAG are shown. The values are mean  $\pm$  SE (n = 3).



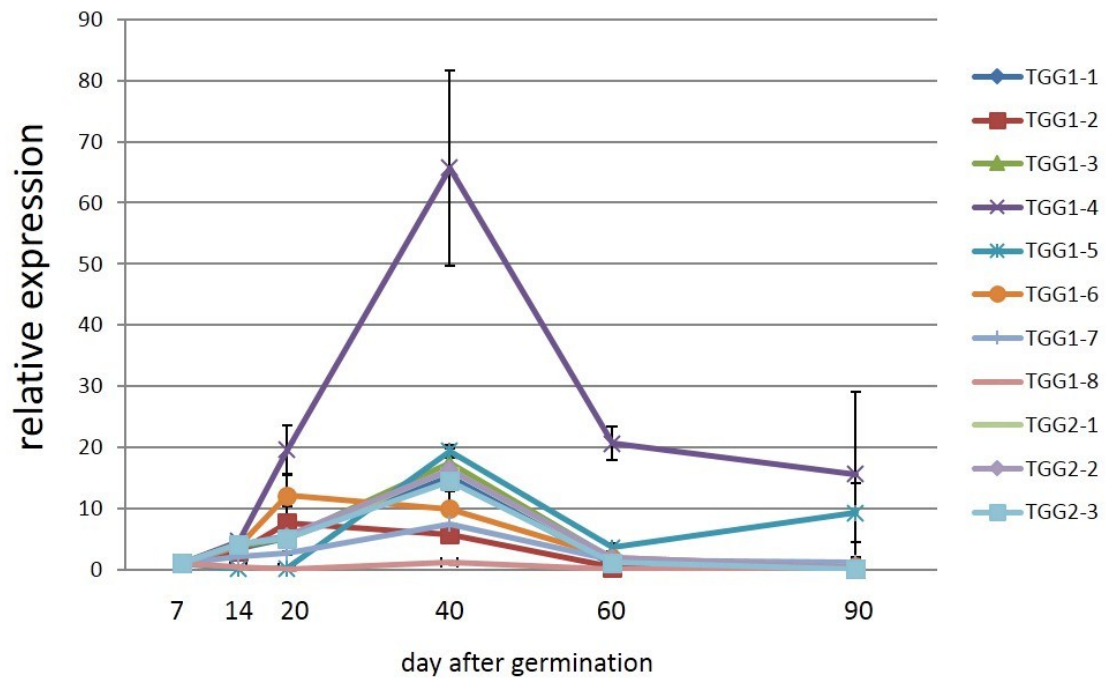

**Supplementary Figure S13. The relative expression level of myrosinase genes in root development.** The expression levels in root (7, 14 and 20 days after germination: DAG) and root tip (40, 60 and 90 DAG) were analyzed by RNA-seq analysis. The expression level of TGG1 and TGG2 like radish myrosinase genes relative to those of the 7 DAG are shown. The values are mean  $\pm$  SE (n = 3).

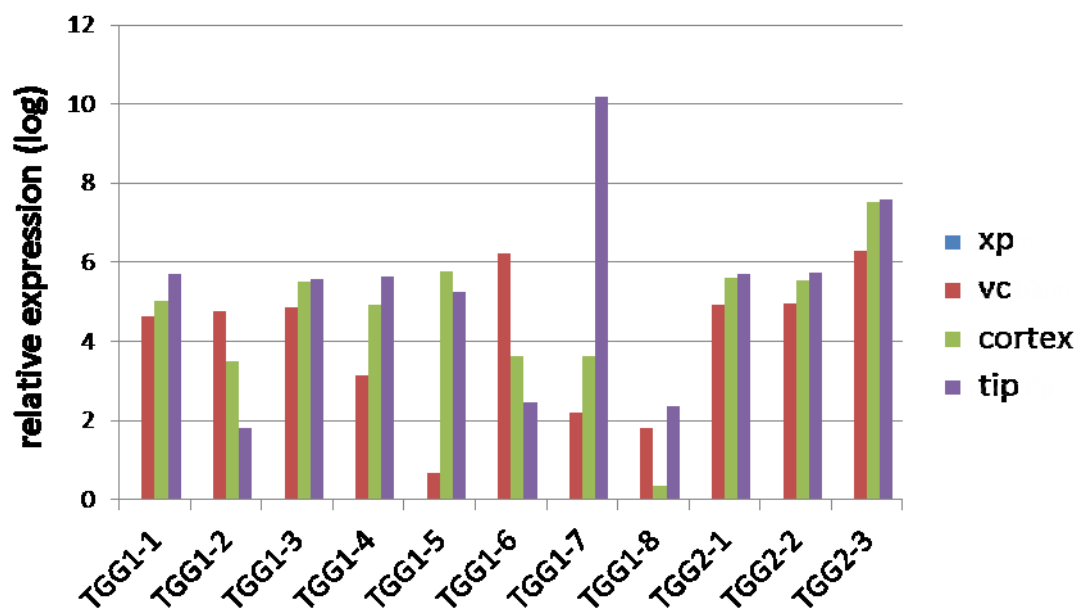

**Supplementary Figure S14. The relative expression level of myrosinase genes in root.** The expression levels in root xylem parenchyma (xp), root vascular cambium (vc), root cortex and root tip were analyzed by RNA-seq analysis. The expression level of TGG1 and TGG2 like radish myrosinase genes relative to those of the xylem parenchyma are shown. The values are mean  $\pm$  SE (n = 3).

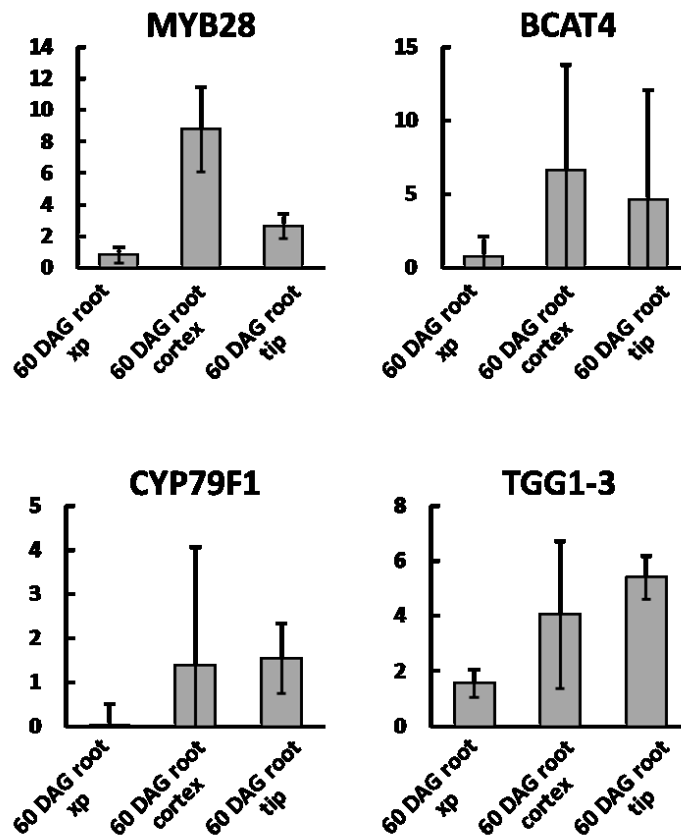

**Supplementary Figure S15. The relative expression level of the four pungency-related genes estimated from RT-qPCR.** The expression levels were adjusted by two reference genes (Actin and CAM7). The expression value of each sample is relative to those of MYB28 of 7 DAG roots. The values are mean  $\pm$  SD (n = 3).

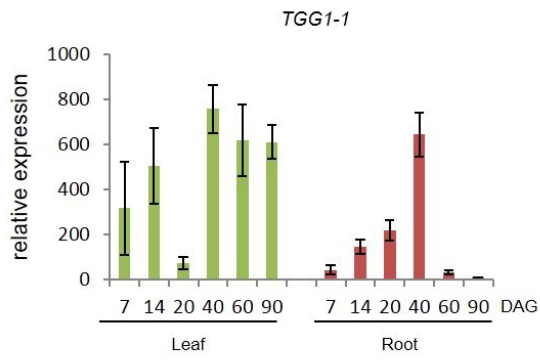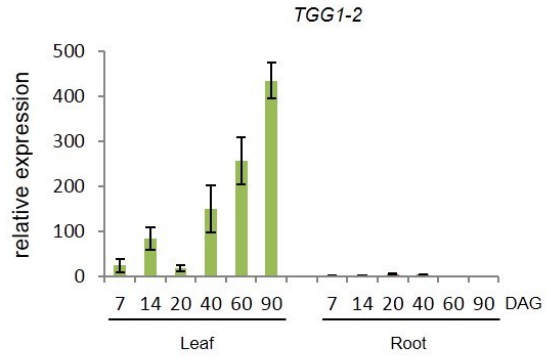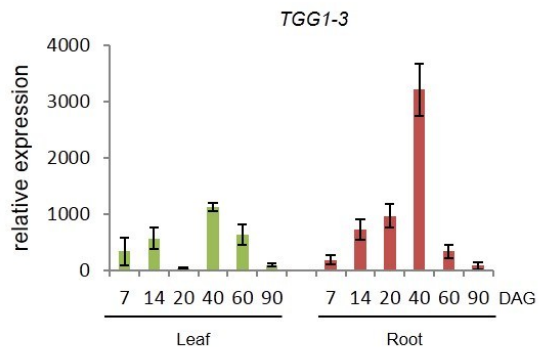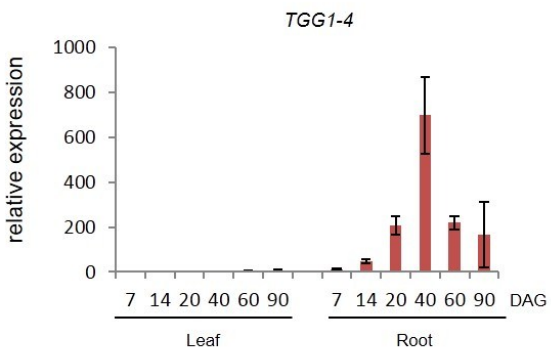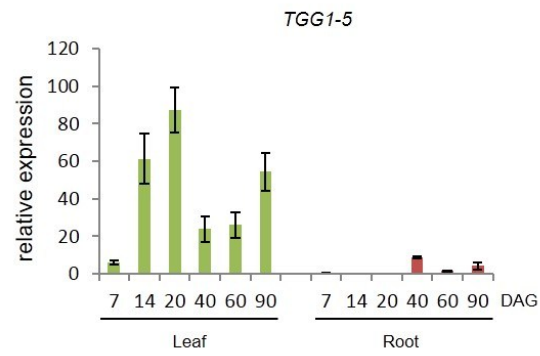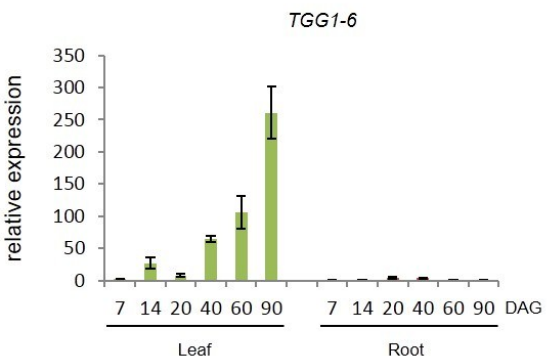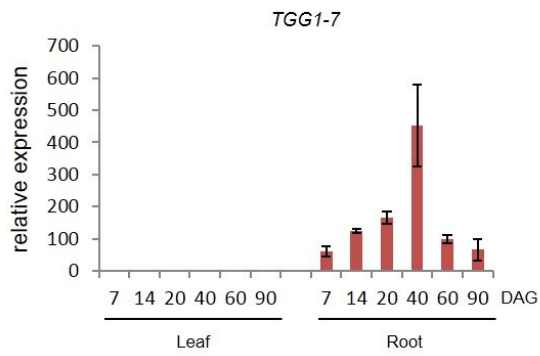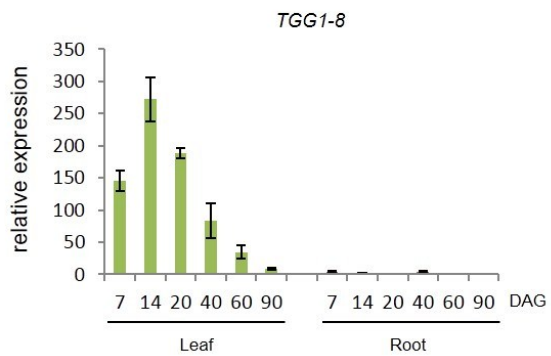

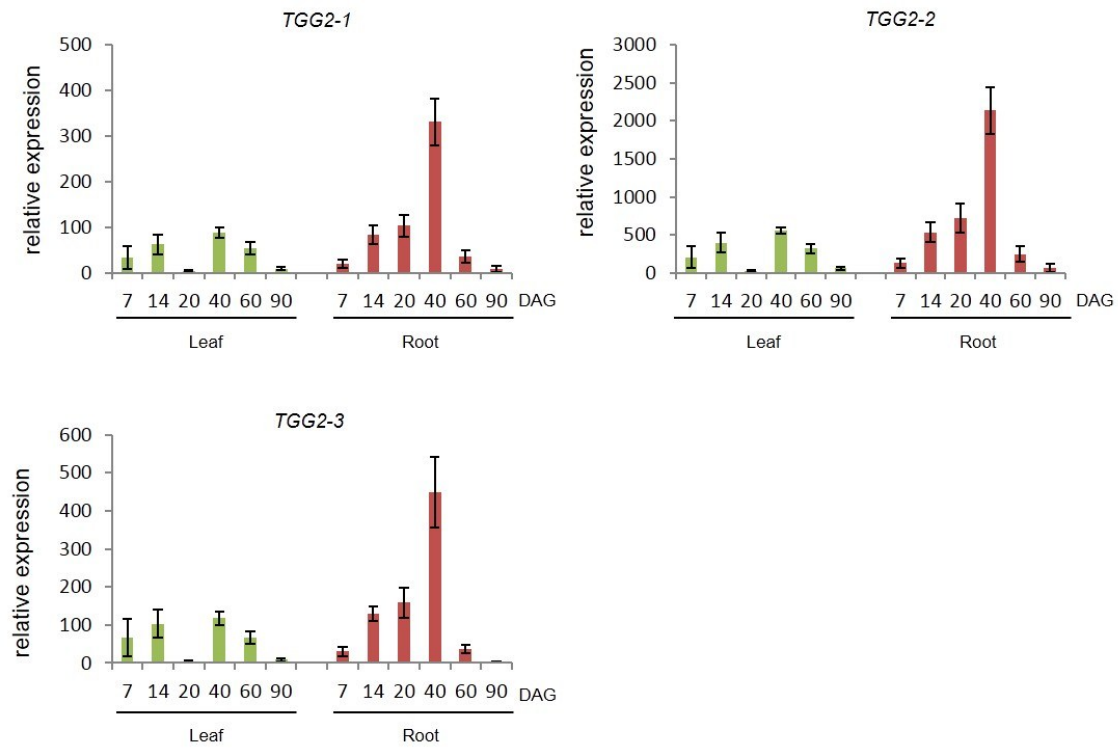

**Supplementary Figure S16. The relative expression level of myrosinase genes in leaf and root.** The expression levels in leaf and root tip were analyzed by RNA-seq analysis. The values are mean  $\pm$  SE (n = 3).

**Supplementary Table S1. NCBI UniGene dataset of *R. sativus* used for the scaffold quality evaluation.**

| Species                                  | No. sequences | Description                                               |
|------------------------------------------|---------------|-----------------------------------------------------------|
| <i>R.sativus</i> convar. <i>oleifera</i> | 5,652         | Arena oil type. Michigan State University, East Lansing   |
| <i>R.sativus</i>                         | 5,381         | Early Sarlet Globe, NK Lawn & Garden                      |
| <i>R.sativus</i>                         | 6,021         | Rat-Tail Radish #3870, John Scheepers Kichen Garden Seeds |
| <i>R.sativus</i>                         | 127           | Other                                                     |

**Supplementary Table S2. Number of radish Unigenes mapped to Scaffolds ( $\geq 500$  bp).**

|                                       | Hit region coverage % |           |           |           |      |
|---------------------------------------|-----------------------|-----------|-----------|-----------|------|
|                                       | > 0                   | $\geq 50$ | $\geq 70$ | $\geq 90$ | 100  |
| No. of mapped Unigenes                | 16,911                | 16,438    | 15,773    | 13,571    | 39   |
| Mapped Unigenes / total Unigenes* (%) | 98.43                 | 95.68     | 91.80     | 78.99     | 0.23 |

\*A total 17,181 Unigenes from NICBI UniGene

**Supplementary Table S3. Estimation of genome size of *R. sativus* based on flow cytometry.**

| Sample  | <i>R. sativus</i> 2C peak position (median) | <i>A. thaliana</i> 4C peak position (median) | Size (Mb) |
|---------|---------------------------------------------|----------------------------------------------|-----------|
| 1       | 87                                          | 48                                           | 569.1     |
| 2       | 85                                          | 46                                           | 580.2     |
| 3       | 84                                          | 46                                           | 573.4     |
| Average |                                             |                                              | 574.2     |



**Supplementary Table S4. Sequencing and assembly of a cDNA library derived from leaves of 20-day old seedlings of *R. sativus*.**

---

|                     |                  |
|---------------------|------------------|
| Library name        | 20-days_leaves_1 |
| Insert size         | 300 bp           |
| No. of entries      | 43,023,361       |
| No. of bases        | 8,604,672,200    |
| No. of contigs      | 99,096           |
| No. of ORFs         | 1,642,042        |
| No. of longest ORFs | 53,846           |

---

The sequence data were registered as BioProject ID PRJDB707.

**Supplementary Table S5. Analysis of gene models and mRNA.**

|                                                      | Scaffold $\geq$ 500 b |           |           |           |       |
|------------------------------------------------------|-----------------------|-----------|-----------|-----------|-------|
| Hit region coverage %                                | > 0                   | $\geq$ 50 | $\geq$ 70 | $\geq$ 90 | 100   |
| Number of hit genes                                  | 50,196                | 22,949    | 16,380    | 9,755     | 5,554 |
| Number of hit mRNA<br>/ number of mRNA %             | 93.22                 | 42.62     | 30.42     | 18.12     | 10.31 |
| Number of hit gene model<br>/ number of gene model % | 93.83                 | 42.90     | 30.62     | 18.24     | 10.38 |

Supplementary Table S6. Gene ontology for *R. sativus*, *A. thaliana*, and *B. rapa*.

|                    | GO ID      |                                                    | <i>R.sativus</i> % | <i>A.thaliana</i> % | <i>B.rapa</i> % |
|--------------------|------------|----------------------------------------------------|--------------------|---------------------|-----------------|
|                    | GO:0016209 | antioxidant activity                               | 0.335              | 0.361               | 0.388           |
|                    | GO:0005488 | binding                                            | 51.328             | 49.043              | 47.953          |
|                    | GO:0003824 | catalytic activity                                 | 37.977             | 39.322              | 39.575          |
|                    | GO:0016247 | channel regulator activity                         | 0.012              | 0.020               | 0.023           |
|                    | GO:0009055 | electron carrier activity                          | 1.014              | 1.168               | 1.281           |
|                    | GO:0030234 | enzyme regulator activity                          | 0.772              | 0.756               | 0.875           |
|                    | GO:0016530 | metallochaperone activity                          | 0.005              | 0.009               | 0.004           |
| molecular_function | GO:0060089 | molecular transducer activity                      | 0.455              | 0.608               | 0.524           |
| GO:0003674         | GO:0044092 | negative regulation of molecular function          | 0.584              | 0.533               | 0.630           |
|                    | GO:0001071 | nucleic acid binding transcription factor activity | 1.621              | 1.633               | 1.928           |
|                    | GO:0045735 | nutrient reservoir activity                        | 0.098              | 0.128               | 0.116           |
|                    | GO:0044093 | positive regulation of molecular function          | 0.150              | 0.218               | 0.189           |
|                    | GO:0000988 | protein binding transcription factor activity      | 0.090              | 0.117               | 0.104           |
|                    | GO:0004872 | receptor activity                                  | 0.127              | 0.181               | 0.145           |
|                    | GO:0065009 | regulation of molecular function                   | 1.124              | 1.216               | 1.294           |
|                    | GO:0005198 | structural molecule activity                       | 1.247              | 1.346               | 1.428           |
|                    | GO:0005215 | transporter activity                               | 3.060              | 3.342               | 3.543           |
|                    | GO:0005623 | cell                                               | 24.886             | 24.918              | 24.645          |
|                    | GO:0044464 | cell part                                          | 24.886             | 24.918              | 24.645          |
|                    | GO:0031012 | extracellular matrix                               | 0.030              | 0.024               | 0.030           |
|                    | GO:0005576 | extracellular region                               | 0.863              | 0.825               | 0.968           |
|                    | GO:0044421 | extracellular region part                          | 0.026              | 0.014               | 0.039           |
|                    | GO:0032991 | macromolecular complex                             | 8.898              | 8.783               | 8.972           |
|                    | GO:0016020 | membrane                                           | 15.533             | 15.316              | 15.828          |
| cellular_component | GO:0044425 | membrane part                                      | 7.511              | 7.588               | 7.716           |
| GO:0005575         | GO:0031974 | membrane-enclosed lumen                            | 0.672              | 0.820               | 0.731           |
|                    | GO:0009295 | nucleoid                                           | 0.009              |                     |                 |
|                    | GO:0043226 | organelle                                          | 12.794             | 12.682              | 12.486          |
|                    | GO:0044422 | organelle part                                     | 3.892              | 4.101               | 3.931           |
|                    | GO:0019012 | virion                                             |                    | 0.005               |                 |
|                    | GO:0044423 | virion part                                        |                    | 0.005               |                 |
|                    | GO:0045202 | synapse                                            |                    |                     | 0.004           |
|                    | GO:0044456 | synapse part                                       |                    |                     | 0.004           |
|                    | GO:0022610 | biological adhesion                                | 0.003              | 0.009               | 0.004           |
|                    | GO:0065007 | biological regulation                              | 5.060              | 5.330               | 5.581           |
|                    | GO:0071840 | cellular component organization or biogenesis      | 0.945              | 1.062               | 1.019           |
|                    | GO:0009987 | cellular process                                   | 25.564             | 24.143              | 24.446          |
|                    | GO:0032502 | developmental process                              | 0.043              | 0.038               | 0.046           |
|                    | GO:0051234 | establishment of localization                      | 5.399              | 5.778               | 5.986           |
|                    | GO:0002376 | immune system process                              | 0.004              | 0.004               | 0.002           |
|                    | GO:0051179 | localization                                       | 5.429              | 5.808               | 6.019           |
|                    | GO:0040011 | locomotion                                         | 0.002              |                     |                 |
| biological_process | GO:0008152 | metabolic process                                  | 41.455             | 40.166              | 39.422          |
| GO:0008150         | GO:0051704 | multi-organism process                             | 0.079              | 0.063               | 0.081           |
|                    | GO:0032501 | multicellular organismal process                   | 0.110              | 0.093               | 0.115           |
|                    | GO:0048519 | negative regulation of biological process          | 0.055              | 0.067               | 0.060           |
|                    | GO:0048518 | positive regulation of biological process          | 0.072              | 0.085               | 0.076           |
|                    | GO:0050789 | regulation of biological process                   | 5.009              | 5.277               | 5.529           |
|                    | GO:0000003 | reproduction                                       | 0.084              | 0.069               | 0.090           |
|                    | GO:0022414 | reproductive process                               | 0.071              | 0.053               | 0.071           |
|                    | GO:0050896 | response to stimulus                               | 2.409              | 2.794               | 2.519           |
|                    | GO:0023052 | signaling                                          | 1.248              | 1.485               | 1.317           |
|                    | GO:0044699 | single-organism process                            | 6.959              | 7.675               | 7.617           |

**Supplementary Table S7. Summary of gene family clustering\*.**

| Species           | No. of genes | No. of genes after cdhit | No. of groups | No. of genes in families | No. of groups specific | No. of RBHs / <i>R.sativus</i> |
|-------------------|--------------|--------------------------|---------------|--------------------------|------------------------|--------------------------------|
| <i>R.sativus</i>  | 64,657       | 57,275                   | 21,339        | 41,612                   | 1,272                  | -                              |
| <i>A.lyrata</i>   | 32,670       | 29,961                   | 19,473        | 24,195                   | 426                    | 18,684 (57.1%)                 |
| <i>A.thaliana</i> | 34,407       | 27,296                   | 19,418        | 24,084                   | 137                    | 19,008 (55.2%)                 |
| <i>B.rapa</i>     | 41,173       | 36,369                   | 20,435        | 28,767                   | 250                    | 25,913 (62.9%)                 |
| <i>C.papaya</i>   | 27,793       | 26,659                   | 11,878        | 16,407                   | 668                    | 11,614 (41.8%)                 |
| Total             | 200,700      | 177,560                  | 92,543        | 135,065                  |                        |                                |

\*Description of clusters of orthologous (or paralogous) genes was obtained after applying OrthoMCL. We report also the number of *R.sativus* genes with a reciprocal best-hit (RBH) [11] relationship with the organism. Numbers in parentheses indicate the percent of RBH with *R. sativus*.

**Supplementary Table S8. Pseudomolecules with and without gaps for the 9 linkage groups.**

|       | pseudomolecule<br>[bp] | pseudomolecule<br>without gap [bp] |
|-------|------------------------|------------------------------------|
| LN1   | 14,922,660             | 11,308,404                         |
| LN2   | 26,577,246             | 19,955,032                         |
| LN3   | 27,489,656             | 21,360,322                         |
| LN4   | 25,091,076             | 19,126,438                         |
| LN5   | 23,622,480             | 18,728,960                         |
| LN6   | 15,420,204             | 11,294,379                         |
| LN7   | 15,468,881             | 11,524,955                         |
| LN8   | 15,634,024             | 11,695,520                         |
| LN9   | 15,611,764             | 12,171,734                         |
| Total | 179,837,991            | 137,165,744                        |

**Supplementary Table S9. Summary of the transcript reads of *R. sativus* var. *hortensis* cv. Aokubi.**

| Description                  | Yield<br>(Mbases) | SD   | # Reads<br>(Million) | SD | % of >= Q30<br>Bases (PF) | SD | Mean<br>Quality<br>Score (PF) | SD |
|------------------------------|-------------------|------|----------------------|----|---------------------------|----|-------------------------------|----|
| Day 7 root                   | 2889              | 125  | 29                   | 1  | 88                        | 0  | 35                            | 0  |
| Day 14 root                  | 2854              | 157  | 29                   | 2  | 88                        | 0  | 35                            | 0  |
| Day 20 root                  | 2365              | 508  | 24                   | 5  | 87                        | 0  | 34                            | 0  |
| Day 40 root vascular cambium | 2990              | 456  | 32                   | 4  | 88                        | 0  | 35                            | 0  |
| Day 40 root xylem parenchyma | 3032              | 406  | 34                   | 1  | 88                        | 0  | 35                            | 0  |
| Day 40 root cortex           | 2463              | 241  | 30                   | 2  | 88                        | 0  | 35                            | 0  |
| Day 60 root vascular cambium | 3402              | 1416 | 34                   | 14 | 89                        | 2  | 35                            | 0  |
| Day 60 root xylem parenchyma | 3162              | 1458 | 32                   | 15 | 89                        | 2  | 35                            | 0  |
| Day 60 root cortex           | 2754              | 701  | 28                   | 7  | 88                        | 2  | 35                            | 0  |
| Day 7 leaf                   | 2888              | 127  | 29                   | 1  | 88                        | 0  | 35                            | 0  |
| Day 14 leaf                  | 2959              | 242  | 30                   | 2  | 88                        | 1  | 35                            | 0  |
| Day 20 leaf                  | 2868              | 564  | 29                   | 6  | 86                        | 0  | 34                            | 0  |
| Day 40 leaf                  | 3545              | 166  | 31                   | 6  | 88                        | 2  | 35                            | 0  |
| Day 60 leaf                  | 3751              | 2465 | 38                   | 25 | 88                        | 1  | 35                            | 0  |
| Mean                         | 2995              | 645  | 30                   | 6  | 88                        | 1  | 35                            | 0  |

**Supplementary Table S10. Significant GOs for each of the cluster generated from SOM analyses.** Number of annotated genes were 40,705. BP: Biological Process, CC: Cellular Component, MF: Molecular Function.

Excel file

**Supplementary Table S11. Significant KEGG pathways found in the cluster of upregulated genes at several developmental stages and tissues.**

Excel file



**Supplementary Table S12 Gene inventory of the glucosinolate biosynthesis and the degradation pathway in *R. sativas***

| Gene ID     | AGI code    | Name      | Number |
|-------------|-------------|-----------|--------|
| RSG13682.t1 | AT3G19710.1 | BCAT4     | 1      |
| RSG45676.t1 | AT3G49680.1 | BCAT3     | 2      |
| RSG51233.t1 | AT3G49680.1 |           |        |
| RSG11180.t1 | AT5G23010.1 | MAM1      | 3      |
| RSG13852.t1 | AT5G23010.1 |           |        |
| RSG24637.t1 | AT5G23010.1 |           |        |
| RSG39553.t1 | AT4G13430.1 | IPMI LSU1 | 1      |
| RSG05959.t1 | AT2G43100.1 | IPMI SSU2 | 1      |
| RSG14423.t1 | AT5G14200.1 | IPMDH1    | 1      |
| RSG07720.t1 | AT1G16410.1 | CYP79F1   | 1      |
| RSG12342.t1 | AT4G13770.1 | CYP83A1   | 1      |
| RSG37909.t1 | AT3G03190.1 | GSTF11    | 1      |
| RSG28592.t1 | AT1G78370.1 | GSTF20    | 1      |
| RSG01617.t1 | AT4G30530.1 | GGP1      | 3      |
| RSG28117.t1 | AT4G30530.1 |           |        |
| RSG30252.t1 | AT4G30530.1 |           |        |
| RSG38701.t1 | AT2G20610.1 | SUR1      | 1      |
| RSG35660.t1 | AT1G24100.1 | UGT74B1   | 1      |
| RSG38352.t1 | AT2G31790.1 | UGT74C1   | 2      |
| RSG13253.t1 | AT2G31790.1 |           |        |
| RSG03557.t1 | AT1G18590.1 | SOT17     | 2      |
| RSG12634.t1 | AT1G18590.1 |           |        |
| RSG07388.t1 | AT1G74090.1 | SOT18     | 9      |
| RSG12630.t1 | AT1G74090.1 |           |        |
| RSG12631.t1 | AT1G74090.1 |           |        |
| RSG12632.t1 | AT1G74090.1 |           |        |
| RSG12635.t1 | AT1G74090.1 |           |        |
| RSG32297.t1 | AT1G74090.1 |           |        |
| RSG32298.t1 | AT1G74090.1 |           |        |
| RSG49978.t1 | AT1G74090.1 |           |        |
| RSG34220.t1 | AT1G74090.1 |           |        |
| RSG02956.t1 | AT2G14750.1 | APK1      | 1      |
| RSG17909.t1 | AT4G39940.1 | APK2      | 3      |
| RSG23430.t1 | AT4G39940.1 |           |        |
| RSG33797.t1 | AT4G39940.1 |           |        |
| RSG05041.t1 | AT5G27380.1 | GSH2      | 2      |
| RSG17778.t1 | AT5G27380.1 | GSH2      |        |
| RSG00914.t1 | AT4G23100.3 | GSH1      | 3      |
| RSG00915.t1 | AT4G23100.3 | GSH1      |        |
| RSG07930.t1 | AT4G23100.3 | GSH1      |        |
| RSG43277.t1 | AT5G54810.1 | TSB1      | 1      |

**Supplementary Table S12. Continued.**

|             |             |            |   |
|-------------|-------------|------------|---|
| RSG02731.t1 | AT5G05260.1 |            |   |
| RSG08366.t1 | AT5G05260.1 | CYP79A2    | 3 |
| RSG38144.t1 | AT5G05260.1 |            |   |
| RSG17908.t1 | AT4G39950.1 |            |   |
| RSG23431.t1 | AT4G39950.1 | CYP79B2    | 3 |
| RSG33798.t1 | AT4G39950.1 |            |   |
| RSG34152.t1 | AT2G22330.1 | CYP79B3    | 1 |
| RSG48186.t1 | AT4G31500.1 | CYP83B1    | 1 |
| RSG18947.t1 | AT2G30860.1 | GSTF9      |   |
| RSG32253.t1 | AT2G30860.1 | GSTF9      | 1 |
| RSG32254.t1 | AT2G30870.1 | GSTF10     | 1 |
| RSG07387.t1 | AT1G74100.1 | SOT16      |   |
| RSG28254.t1 | AT1G74100.1 | SOT16      | 2 |
| RSG43366.t1 | AT4G12030.2 | BAT5       | 1 |
| RSG15203.t1 | AT1G21100.1 | IGMT1      |   |
| RSG26550.t1 | AT1G21100.1 | IGMT1      | 1 |
| RSG59991.t1 | AT1G21100.1 | IGMT1      |   |
| RSG15204.t1 | AT1G21120.1 | IGMT2      | 1 |
| RSG32181.t1 | AT1G65880.1 | BZO1       | 1 |
| RSG00041.t1 | AT2G25450.1 | GS-OH      | 1 |
| RSG51376.t1 | AT1G65860.1 |            |   |
| RSG57085.t1 | AT1G65860.1 | FMO GS-OX1 | 2 |
| RSG57158.t1 | AT1G62540.1 |            |   |
| RSG15645.t1 | AT1G62540.1 | FMO GS-OX2 | 2 |
| RSG14855.t1 | AT1G12140.1 |            |   |
| RSG28761.t1 | AT1G12140.1 | FMO GS-OX5 | 2 |
| RSG11506.t1 | AT5G57220.1 |            |   |
| RSG29212.t1 | AT5G57220.1 | CYP81F2    | 3 |
| RSG29215.t1 | AT5G57220.1 |            |   |
| RSG40296.t1 | AT5G57220.1 | CYP81F2    | 1 |
| RSG10178.t1 | AT4G37400.1 |            |   |
| RSG23271.t1 | AT4G37400.1 | CYP81F3    | 2 |
| RSG10180.t1 | AT4G37410.1 | CYP81F4    | 1 |
| RSG16088.t1 | AT5G61420.2 | MYB28      |   |
| RSG23384.t1 | AT5G61420.2 | MYB28      | 3 |
| RSG53581.t1 | AT5G61420.1 | MYB28      |   |
| RSG00789.t1 | AT5G07690.1 | MYB29      |   |
| RSG09585.t1 | AT5G07690.1 | MYB29      | 2 |
| RSG23127.t1 | AT5G26000.1 |            |   |
| RSG25390.t1 | AT5G26000.1 |            |   |
| RSG30299.t1 | AT5G26000.1 |            |   |
| RSG33328.t1 | AT5G26000.1 |            |   |
| RSG36879.t1 | AT5G26000.1 | TGG1       | 8 |
| RSG40666.t1 | AT5G26000.1 |            |   |
| RSG48132.t1 | AT5G26000.1 |            |   |
| RSG52100.t1 | AT5G26000.1 |            |   |
| RSG30297.t1 | AT5G25980.3 |            |   |
| RSG30298.t1 | AT5G25980.3 | TGG2       | 3 |
| RSG40189.t1 | AT5G25980.3 |            |   |

**Supplementary Table S13. Summary of entries, bases, sequence coverage, clone coverage, insert size for each library.**

| Library name | Insert size [bp] | No. of entries | No. of bases [bp] | Sequence coverage | Sequencer          |
|--------------|------------------|----------------|-------------------|-------------------|--------------------|
| PE300_L001   | 300              | 123,214,198    | 24,642,839,600    | 42.9              | Illumina Hiseq2000 |
| PE300_L002   | 300              | 134,426,349    | 26,885,269,800    | 46.8              |                    |
| PE500_L005   | 500              | 28,689,277     | 5,737,855,400     | 10.0              |                    |
| MP8K_L006    | 8,000            | 7,310,349      | 1,462,069,800     | 2.5               |                    |
| MP8K_L007    | 8,000            | 8,808,233      | 1,761,646,600     | 3.1               |                    |
| MK20K_L006   | 20,000           | 6,706,289      | 1,341,257,800     | 2.3               |                    |
| MK20K_L007   | 20,000           | 8,062,897      | 1,612,579,400     | 2.8               |                    |
| MK40K_L006   | 40,000           | 3,211,854      | 642,360,800       | 1.1               |                    |
| MK40K_L007   | 40,000           | 3,884,995      | 776,999,000       | 1.4               |                    |
| SE           | -                | 13,743,860     | 5,040,510,672     | 8.8               |                    |
| Total        |                  | 338,058,301    | 69,903,388,872    | 121.8             |                    |

Supplementary Table S14. Assembly results summary by Ray, CLC bio, and Newbler; "input" means used file's property with sequencer type, read type, and insert size; "contig" means number of contig, number of bases (Mb), average contig size (bp), N50 contig size (bp), and largest contig size (bp); "scaffold" means number of scaffold, number of bases (Mb), average scaffold size (bp), N50 scaffold size (bp), and largest scaffold size (bp).

| case | assembler           | version | INPUT    |       |       |      |       |       | CONTIG           |                     |                      |                      |                          | SCAFFOLD           |                      |                        |                        |                            |
|------|---------------------|---------|----------|-------|-------|------|-------|-------|------------------|---------------------|----------------------|----------------------|--------------------------|--------------------|----------------------|------------------------|------------------------|----------------------------|
|      |                     |         | 454(x10) | PE300 | PE500 | MP8K | MP20K | MP40K | number Of Contig | number Of Base [Mb] | avg Contig Size [bp] | N50 Contig Size [bp] | largest Contig Size [bp] | number Of Scaffold | number Of Bases [Mb] | avg Scaffold Size [bp] | N50 Scaffold Size [bp] | largest Scaffold Size [bp] |
| 1    | Ray                 | 2.0.0   | 1        | 1     | 1     |      |       |       | 144,609          | 280.47              | 1,939                | 6,341                | 136,286                  | 144,147            | 281.73               | 1,954                  | 6,429                  | 136,286                    |
| 2    | CLC GenomeWorkbench | 5.5.1   | 1        | 1     | 1     | 1    |       |       | 176,279          | 268.53              | 1,523                | 5,137                | 85,323                   | 142,484            | 302.41               | 2,122                  | 9,320                  | 107,236                    |
| 3    | newbler             | 2.7     | 1        | 1     | 1     | 1    |       |       | 75,208           | 261.10              | 3,471                | 6,760                | 66,146                   | 9,013              | 284.88               | 31,607                 | 105,385                | 942,732                    |
| 3.1  | newbler+SSPACE      | 2.7+2.0 | 1        | 1     | 1     | 1    | 1     | 1     | -                | -                   | -                    | -                    | -                        | 40,123             | 353.77               | 40,728                 | 158,632                | 1,313,578                  |

**Supplementary Table S15. Repeat sequences obtained from analysis REPET.**

| Class          | Subclass          | Length [Mb] | Length/<br>Scaffold % |
|----------------|-------------------|-------------|-----------------------|
| I              | DIRS              | 0.04        | 0.01                  |
|                | LTR               | 41.65       | 10.85                 |
|                | LINE              | 15.92       | 4.15                  |
|                | SINE              | 2.62        | 0.68                  |
|                | noCat             | 2.88        | 0.75                  |
| II             | Helitron          | 2.81        | 0.73                  |
|                | Maverick          | 0.23        | 0.06                  |
|                | MITE              | 0.94        | 0.25                  |
|                | TIR               | 9.74        | 2.54                  |
|                | noCat             | 0.45        | 0.12                  |
| NA             | PotentialHostGene | 19.55       | 5.09                  |
| noCat          | Helitron LARD     | 0.15        | 0.04                  |
| noCat          | SINE TIR          | 0.11        | 0.03                  |
| noCat          | noCat             | 36.24       | 9.44                  |
| Satellite      |                   | 1.46        | 0.38                  |
| Simple_repeat  |                   | 1.36        | 0.35                  |
| Low_complexity |                   | 4.41        | 1.15                  |
| Total          |                   | 140.52      | 36.61                 |

**Supplementary Table S16. Marker information used to construct a linkage map.**

**Excel file**

**Supplementary Table S17. Relationships among linkage groups. Blue line indicates same direction and red line indicates reverse direction.**

|                   |      |      |      |      |      |      |      |      |      |
|-------------------|------|------|------|------|------|------|------|------|------|
| Present research  | LN1  | LN2  | LN3  | LN4  | LN5  | LN6  | LN7  | LN8  | LN9  |
| Number of markers | 131  | 176  | 217  | 212  | 202  | 116  | 124  | 102  | 96   |
| Kazusa LN         | LN1+ | LN2+ | LN3+ | LN4+ | LN5+ | LN6+ | LN7+ | LN8+ | LN9+ |
|                   |      |      |      |      |      |      |      |      |      |
| Tohoku LN         | LN2+ | LN3+ | LN4- | LN5- | LN6+ | LN8+ | LN7+ | LN9- | LN1+ |

**Supplementary Table S18. Sequence of primer pairs used for RT-qPCR for sucrose metabolism and pungency related genes.**

| Gene      |         | Primer name   | Sequence (5' - 3')       | Source                   |
|-----------|---------|---------------|--------------------------|--------------------------|
| RsSUS1a   | Forward | RsSUS1a_1L    | GGTAAAGGCATCCTCCAACAG    | Developed for this study |
|           | Reverse | RsSUS1a_1R    | CATGGTGGCAACACAATAGC     | Developed for this study |
| RsSUS1b   | Forward | RsSUS1b_1L    | GAAACGAAGTCCTTGCCTTG     | Developed for this study |
|           | Reverse | RsSUS1b_1R    | CCCATGGTGGCAACACTATT     | Developed for this study |
| RsMYB28a  | Forward | RsMYB28a_1F   | GCGAGTTTAGTTCGGAGGAG     | Developed for this study |
|           | Reverse | RsMYB28a_1R   | TGCATCTAGGGAATGCAAGC     | Developed for this study |
| RsBCAT4   | Forward | RsBCAT4_Fwd   | AACGCTCTCCGCCTTCAGTC     | Developed for this study |
|           | Reverse | RsBCAT4_Rev   | CCGAGGGACAAGGCATACA      | Developed for this study |
| RsCYP79F1 | Forward | RsCYP79F1_Fwd | CGGCAATTTACCCGAACTAA     | Developed for this study |
|           | Reverse | RsCYP79F1_Rev | GTTTATGACGATGGCGTGTG     | Developed for this study |
| RsTGG1    | Forward | RsTGG1c_Fwd   | ATTCCACGCGGATTGACTAC     | Developed for this study |
|           | Reverse | RsTGG1c_Rev   | GACGGTAAATCCTTGGCAGA     | Developed for this study |
| RsCAM7    | Forward | RsCAM7_1L     | TGACCGATGACCAGATCTCA     | Developed for this study |
|           | Reverse | RsCAM7_1R     | AGTGACCTCATCACGGTTCC     | Developed for this study |
| Actin     | Forward |               | ATCAGGAAGGACTTGTACGGTAAC | Zou et al. <sup>76</sup> |
|           | Reverse |               | GCTGAGGGAAGCAAGAATGGAACC | Zou et al. <sup>76</sup> |
